# Supplementary material for: The mechanistic investigations of photochemical carbonyl elimination and oxidative addition reactions of (η5-C5H5)M(CO)3, (M = Mn and Re) complexes
Source: Royal Society of Chemistry journal article supplement (doi:10.1039/c8ra01118d), 2018-01-01
Supplement: c8ra01118d1.pdf [file c8ra01118d1.pdf]

# Supplementary Materials

## The Mechanistic Investigations of Photochemical Carbonyl Elimination and Oxidative Addition Reactions of ( $\eta^5$ - $C_5H_5$ )M(CO)<sub>3</sub> (M = Mn and Re) Complexes

Zheng-Feng Zhang<sup>1</sup> and Ming-Der Su<sup>1,2\*</sup>

<sup>1</sup>Department of Applied Chemistry, National Chiayi University, Chiayi 60004,  
Taiwan

<sup>2</sup>Department of Medicinal and Applied Chemistry, Kaohsiung Medical  
University, Kaohsiung 80708, Taiwan

\*E-mail: midesu@mail.ncyu.edu.tw

**(All were calculated at the CAS(14,13)/Def2-SVPD (geometry) and  
the MP2-CAS(14,13)/Def2-SVPD//CAS(14,13)/Def2-SVPD  
(energy) level of theory)**

-----  
-----  
Mn-SO-Rea  
-----  
-----

| Atomic<br>Number | Coordinates (Angstroms) |           |           |
|------------------|-------------------------|-----------|-----------|
|                  | X                       | Y         | Z         |
| Mn               | 0.000000                | 0.000000  | 0.000000  |
| C                | 0.000000                | 0.000000  | 2.248000  |
| C                | 1.368796                | 0.000000  | 1.819141  |
| C                | 1.601953                | -1.177293 | 1.085954  |
| C                | 0.377549                | -1.949087 | 1.081642  |
| C                | -0.583188               | -1.233647 | 1.824915  |
| H                | -0.459439               | 0.727828  | 2.878790  |
| H                | 2.084739                | 0.766546  | 2.018124  |
| H                | 2.530086                | -1.477933 | 0.653354  |
| H                | 0.254360                | -2.921036 | 0.658828  |
| H                | -1.583301               | -1.550556 | 2.023671  |
| C                | -1.828041               | 0.198279  | -0.478999 |
| C                | 0.407005                | 1.796701  | -0.375256 |
| C                | 0.497943                | -0.598443 | -1.652263 |
| O                | -2.935738               | 0.295330  | -0.747266 |
| O                | 0.678889                | 2.891600  | -0.578733 |
| O                | 0.834856                | -0.999856 | -2.680500 |

-----  
-----  
Energy = -633.371131 hartree  
-----  
-----  
-----

## Mn-T1-Min

---

---

| Atomic<br>Number | Coordinates (Angstroms) |             |             |
|------------------|-------------------------|-------------|-------------|
|                  | X                       | Y           | Z           |
| Mn               | 0.01237600              | -0.01548500 | -0.02081700 |
| C                | 0.02864400              | -0.03545100 | 2.28356600  |
| C                | 1.39501700              | -0.04364300 | 1.88176800  |
| C                | 1.61750900              | -1.20818100 | 1.12536100  |
| C                | 0.39907200              | -1.97492600 | 1.12145200  |
| C                | -0.55694200             | -1.26785100 | 1.87426800  |
| H                | -0.45073500             | 0.72432500  | 2.90039800  |
| H                | 2.12138600              | 0.74683800  | 2.07216700  |
| H                | 2.55751600              | -1.51100800 | 0.66537500  |
| H                | 0.26971500              | -2.95587700 | 0.66560000  |
| H                | -1.58419100             | -1.57894600 | 2.06565700  |
| C                | -2.04627400             | 0.18387500  | -0.54637600 |
| C                | 0.48576800              | 1.99827500  | -0.43623000 |
| C                | 0.51302100              | -0.61313000 | -1.70656000 |
| O                | -3.13959700             | 0.27477500  | -0.81160300 |
| O                | 0.75588300              | 3.07502500  | -0.64115100 |
| O                | 0.86830200              | -1.03018400 | -2.71347300 |

---

---

## Mn-T1-TS1

---

---

| Atomic<br>Number | Coordinates (Angstroms) |             |             |
|------------------|-------------------------|-------------|-------------|
|                  | X                       | Y           | Z           |
| Mn               | 0.03997700              | -0.25793700 | -0.03759500 |
| C                | 1.44614800              | 1.21644200  | -1.07807900 |
| C                | 1.99420700              | -0.10333400 | -1.18484500 |
| C                | 2.28980600              | -0.56647600 | 0.11396000  |
| C                | 1.91257000              | 0.46733600  | 1.03621100  |
| C                | 1.45043800              | 1.58072700  | 0.29106900  |
| H                | 1.14923000              | 1.85505000  | -1.91070000 |

---

---

|   |             |             |             |
|---|-------------|-------------|-------------|
| H | 2.14821800  | -0.65280800 | -2.11640200 |
| H | 2.72285400  | -1.53351400 | 0.37586700  |
| H | 2.03407600  | 0.42455200  | 2.11909300  |
| H | 1.10821300  | 2.53095400  | 0.70954300  |
| C | -1.84405700 | 1.58758800  | 0.33502900  |
| C | -1.23534400 | -0.95494700 | -1.41886800 |
| C | -0.57206200 | -1.29361400 | 1.36457800  |
| O | -2.58519300 | 2.39840200  | 0.58479100  |
| O | -1.90379800 | -1.41314300 | -2.21536200 |
| O | -0.86253900 | -1.95752500 | 2.25659100  |

-----  
-----  
-----  
-----  
Mn-T1-IM  
-----  
-----

| Atomic<br>Number | Coordinates (Angstroms) |   |   |
|------------------|-------------------------|---|---|
|                  | X                       | Y | Z |

|    |             |             |             |
|----|-------------|-------------|-------------|
| Mn | 0.00090200  | 0.00488200  | 0.74993200  |
| H  | 2.20279400  | -0.60695900 | -1.13797100 |
| C  | 1.16248800  | -0.32510300 | -1.11462500 |
| C  | 0.66022900  | 1.00772100  | -1.09909600 |
| H  | 0.11820500  | -2.29089400 | -1.13913800 |
| H  | 1.25781800  | 1.90509800  | -1.09651500 |
| C  | -0.75232100 | 0.93964200  | -1.06859000 |
| H  | -1.43398800 | 1.77456800  | -1.06537200 |
| C  | -1.12398000 | -0.44447600 | -1.08043600 |
| H  | -2.13187500 | -0.82671100 | -1.08649100 |
| C  | 0.06037700  | -1.21380800 | -1.13747000 |
| C  | -1.43003900 | 0.16809900  | 1.89921600  |
| O  | -2.35938300 | 0.28052400  | 2.56036800  |
| C  | 1.42521100  | -0.13863800 | 1.92216100  |
| O  | 2.34356100  | -0.23394600 | 2.59984700  |

## Mn-Tl-Cpx

| Atomic<br>Number | Coordinates (Angstroms) |             |             |
|------------------|-------------------------|-------------|-------------|
|                  | X                       | Y           | Z           |
| Mn               | -0.77593200             | 0.05031500  | -0.02051400 |
| C                | -0.47006500             | 1.60552700  | -0.98857900 |
| 8                | -0.35719600             | 2.56390300  | -1.61149700 |
| C                | -0.78968700             | 1.10002900  | 1.67263100  |
| 8                | -0.85401700             | 1.70654900  | 2.62790500  |
| Si               | 2.62005900              | -0.53447000 | -0.02982200 |
| C                | 2.76466000              | -0.36417800 | -1.89489100 |
| H                | 2.38252000              | 0.61664300  | -2.23001400 |
| H                | 2.18676600              | -1.14878300 | -2.41275000 |
| H                | 3.81828500              | -0.44945200 | -2.21780500 |
| C                | 3.47485600              | 0.88437200  | 0.85560400  |
| H                | 3.06781300              | 1.85061900  | 0.50945800  |
| H                | 4.56157000              | 0.88374800  | 0.66094400  |
| H                | 3.32516600              | 0.82104500  | 1.94714800  |
| C                | 3.19305200              | -2.22082100 | 0.57425600  |
| H                | 4.26104900              | -2.39408500 | 0.35650100  |
| H                | 2.61121000              | -3.02110000 | 0.08533300  |
| H                | 3.04724100              | -2.31427800 | 1.66426200  |
| H                | 1.15991800              | -0.44184600 | 0.30613400  |
| H                | -0.26306800             | -2.55599800 | -1.48772200 |
| C                | -1.08398400             | -2.01029700 | -1.02046400 |
| C                | -1.49013500             | -2.10612100 | 0.32948800  |
| H                | -1.84811500             | -0.73988300 | -2.70051500 |
| H                | -1.06519500             | -2.76721300 | 1.08456400  |
| C                | -2.61803100             | -1.24583200 | 0.50925000  |
| H                | -3.16896400             | -1.11541600 | 1.44083500  |
| C                | -2.89013600             | -0.60392300 | -0.71465700 |
| H                | -3.68997400             | 0.10813600  | -0.91065400 |
| C                | -1.90667900             | -1.04103300 | -1.65502000 |

---

---

| Atomic<br>Number | Coordinates (Angstroms) |             |             |
|------------------|-------------------------|-------------|-------------|
|                  | X                       | Y           | Z           |
| C                | -1.18074800             | 1.68843800  | -0.96106100 |
| C                | -0.79384200             | 1.91019000  | 0.38074400  |
| C                | -1.74202000             | 1.28241100  | 1.23850300  |
| C                | -2.67862400             | 0.61069600  | 0.42047500  |
| C                | -2.31515300             | 0.83475700  | -0.94073400 |
| Mn               | -0.61732400             | -0.42199300 | 0.03541300  |
| C                | -0.33756200             | -1.22560200 | -1.79868500 |
| O                | -0.36809400             | -1.51570400 | -2.90184700 |
| C                | -1.34743400             | -1.93835500 | 1.26070600  |
| O                | -1.74564639             | -2.76540042 | 1.92899824  |
| H                | -3.54023000             | 0.03624600  | 0.76211000  |
| H                | -1.73846900             | 1.31306900  | 2.32762400  |
| H                | 0.05406100              | 2.51420400  | 0.70941300  |
| H                | -0.66112200             | 2.04556800  | -1.85032700 |
| H                | -2.86599100             | 0.47917200  | -1.81155000 |
| Si               | 2.33908600              | 0.12983600  | 0.29066400  |
| H                | 3.07367300              | -1.95674600 | -0.87282500 |
| C                | 3.42461100              | -1.37053700 | -0.00651400 |
| H                | 4.45680800              | -1.03841600 | -0.21882500 |
| H                | 3.45807500              | -2.03450900 | 0.87311100  |
| H                | 1.85474700              | 0.67854700  | -2.10745500 |
| C                | 2.29933300              | 1.20636000  | -1.24736700 |
| H                | 1.73543100              | 2.13920600  | -1.08496700 |
| H                | 3.33853300              | 1.47674700  | -1.51175100 |
| C                | 2.91584700              | 1.12355700  | 1.77965300  |
| H                | 3.26162400              | 0.45970700  | 2.59257000  |
| H                | 2.09464800              | 1.74833400  | 2.17686300  |
| H                | 3.75161700              | 1.79457400  | 1.50492000  |
| H                | 0.99455200              | -0.38929400 | 0.76982300  |

---

---

---

---

| Atomic<br>Number | Coordinates (Angstroms) |             |             |
|------------------|-------------------------|-------------|-------------|
|                  | X                       | Y           | Z           |
| C                | -1.3725755              | 1.6874933   | -0.9512499  |
| C                | -1.0574414              | 1.9737822   | 0.3982671   |
| C                | -1.9171666              | 1.2135011   | 1.2308790   |
| C                | -2.8109306              | 0.4916086   | 0.3824602   |
| C                | -2.4781356              | 0.7745750   | -0.9561687  |
| Mn               | -0.6918980              | -0.2163386  | 0.0006808   |
| C                | -0.1238799              | -1.0383770  | -1.5339311  |
| O                | 0.1545289               | -1.5114556  | -2.5405051  |
| C                | -0.8490705              | -1.8552886  | 0.9746659   |
| O                | -0.9866833              | -2.8297106  | 1.5412130   |
| H                | -3.6028160              | -0.1781823  | 0.7173930   |
| H                | -1.9363517              | 1.2266539   | 2.3193889   |
| H                | -0.2588824              | 2.6326078   | 0.7419878   |
| H                | -0.8990195              | 2.1213749   | -1.8311815  |
| H                | -2.9737813              | 0.3780565   | -1.8413116  |
| Si               | 2.3378050               | 0.2202454   | 0.3348618   |
| H                | 2.5264662               | -1.9893827  | -0.8208271  |
| C                | 3.0325168               | -1.4959940  | 0.0260953   |
| H                | 4.1087808               | -1.4320924  | -0.2133723  |
| H                | 2.9237297               | -2.1375997  | 0.9167341   |
| H                | 1.9203449               | 0.7397186   | -2.0792764  |
| C                | 2.3575439               | 1.2738691   | -1.2199293  |
| H                | 1.7929447               | 2.2103334   | -1.0732571  |
| H                | 3.3986629               | 1.5416404   | -1.4751348  |
| C                | 3.2541350               | 1.0929213   | 1.7276118   |
| H                | 3.2269918               | 0.4988531   | 2.6566873   |
| H                | 2.7964483               | 2.0747484   | 1.9390493   |
| H                | 4.3112647               | 1.2609206   | 1.4585032   |
| H                | 0.9368561               | 0.0865805   | 0.9073475   |
| -1               | 0.00271252              | -0.00245509 | 0.00498967  |
| -2               | -0.00427054             | 0.02467005  | 0.00990108  |
| -3               | 0.00343301              | 0.00287065  | -0.00544188 |
| -4               | -0.01889062             | 0.01889311  | -0.00757508 |

|     |             |             |             |
|-----|-------------|-------------|-------------|
| -5  | -0.02091962 | 0.00596999  | 0.00466603  |
| -6  | -0.01581939 | 0.00840570  | -0.05187705 |
| -7  | 0.00305851  | 0.00501219  | 0.02099203  |
| -8  | 0.00553834  | -0.01381301 | -0.02653927 |
| -9  | 0.00540773  | -0.06563637 | 0.03492637  |
| -10 | 0.00016179  | 0.00685479  | -0.00453034 |
| -11 | 0.00018205  | -0.00087901 | 0.00023053  |
| -12 | 0.00057804  | -0.00047351 | 0.00059109  |
| -13 | -0.00126464 | 0.00083510  | 0.00040427  |
| -14 | 0.00036701  | -0.00094017 | -0.00052874 |
| -15 | 0.00056426  | 0.00009953  | 0.00002119  |
| -16 | 0.00231221  | -0.00188603 | 0.01401018  |
| -17 | -0.00017859 | 0.00030086  | -0.00021751 |
| -18 | 0.00191100  | -0.00040468 | -0.00136791 |
| -19 | 0.00030616  | -0.00067186 | 0.00009122  |
| -20 | 0.00020739  | 0.00010979  | 0.00031486  |
| -21 | 0.00017761  | -0.00022925 | -0.00030268 |
| -22 | -0.00284330 | -0.00013116 | -0.00112741 |
| -23 | 0.00024519  | 0.00081560  | -0.00021148 |
| -24 | -0.00009993 | -0.00011508 | 0.00059975  |
| -25 | 0.00599167  | 0.00100204  | -0.00217584 |
| -26 | -0.00022120 | -0.00032339 | -0.00016546 |
| -27 | -0.00022275 | 0.00007116  | -0.00008990 |
| -28 | 0.00084222  | 0.00101815  | 0.00168591  |
| -29 | 0.03073385  | 0.01102992  | 0.00872639  |

Mn-T1/S0-1

| Atomic<br>Number | Coordinates (Angstroms) |             |             |
|------------------|-------------------------|-------------|-------------|
|                  | X                       | Y           | Z           |
| H                | 0.87493100              | 1.28597800  | 2.01093800  |
| C                | 1.19032000              | 0.67712200  | 1.17909800  |
| C                | 1.67737700              | 1.15726000  | -0.07730700 |
| H                | 0.89496600              | -1.38770900 | 1.94382500  |



|    |             |             |             |
|----|-------------|-------------|-------------|
| H  | 1.81166800  | 2.18943000  | -0.35705500 |
| C  | 1.98671600  | 0.02815200  | -0.87180600 |
| H  | 2.34861500  | 0.05685200  | -1.88876200 |
| C  | 1.69513500  | -1.14481300 | -0.13393000 |
| H  | 1.84784000  | -2.15950600 | -0.46243600 |
| C  | 1.20187200  | -0.73376500 | 1.14394900  |
| Mn | -0.14922100 | -0.00146900 | -0.38895000 |
| C  | -1.36863600 | 1.30470600  | -0.10428500 |
| O  | -2.11985000 | 2.13817700  | 0.14248500  |
| C  | -1.37886400 | -1.29887000 | -0.10344400 |
| O  | -2.13902500 | -2.12406100 | 0.14296500  |

Mn-SO-IM

| Atomic<br>Number | Coordinates (Angstroms) |   |   |
|------------------|-------------------------|---|---|
|                  | X                       | Y | Z |

|    |           |           |           |
|----|-----------|-----------|-----------|
| Mn | 0.000000  | 0.000000  | 0.000000  |
| C  | 0.000000  | 0.000000  | 2.347899  |
| C  | 1.349262  | 0.000000  | 1.865830  |
| C  | 1.561353  | -1.200492 | 1.138030  |
| C  | 0.340729  | -1.941789 | 1.147485  |
| C  | -0.609494 | -1.201423 | 1.912268  |
| H  | -0.440723 | 0.743981  | 2.973975  |
| H  | 2.079233  | 0.756598  | 2.052093  |
| H  | 2.488351  | -1.516739 | 0.711519  |
| H  | 0.199955  | -2.926908 | 0.758517  |
| H  | -1.608478 | -1.512015 | 2.131338  |
| C  | -1.812223 | 0.124116  | -0.747739 |
| C  | 0.475651  | 1.646234  | -0.544997 |
| O  | -2.872036 | 0.209889  | -1.148053 |
| O  | 0.809906  | 2.726175  | -0.850613 |

Energy = -520.607049 hartree

Mn-SO-Cpx

| Atomic<br>Number | Coordinates (Angstroms) |           |           |
|------------------|-------------------------|-----------|-----------|
|                  | X                       | Y         | Z         |
| Mn               | -0.688066               | 0.036969  | 0.005150  |
| C                | -0.423486               | 1.529697  | -0.971437 |
| O                | -0.291306               | 2.491320  | -1.614250 |
| C                | -0.743105               | 0.966888  | 1.608026  |
| O                | -0.821534               | 1.549844  | 2.599170  |
| Si               | 2.539703                | -0.487070 | -0.070810 |
| C                | 2.775750                | -0.355085 | -1.939938 |
| H                | 2.457965                | 0.612203  | -2.313079 |
| H                | 2.212328                | -1.117529 | -2.467222 |
| H                | 3.824407                | -0.481572 | -2.195652 |
| C                | 3.408895                | 0.912328  | 0.850160  |
| H                | 3.061369                | 1.881649  | 0.508805  |
| H                | 4.481829                | 0.869280  | 0.686106  |
| H                | 3.233575                | 0.852098  | 1.919237  |
| C                | 3.037558                | -2.189339 | 0.580786  |
| H                | 4.091023                | -2.378585 | 0.394983  |
| H                | 2.469483                | -2.977595 | 0.097672  |
| H                | 2.869479                | -2.263958 | 1.650191  |
| H                | 1.081467                | -0.361763 | 0.245184  |
| H                | -0.238966               | -2.536712 | -1.492619 |
| C                | -1.013858               | -1.981391 | -1.011491 |
| C                | -1.405164               | -2.094677 | 0.355422  |
| H                | -1.832129               | -0.743042 | -2.663031 |
| H                | -1.005067               | -2.776154 | 1.073457  |
| C                | -2.533463               | -1.239100 | 0.553698  |
| H                | -3.070093               | -1.118794 | 1.470083  |
| C                | -2.807665               | -0.568264 | -0.658528 |
| H                | -3.607335               | 0.116902  | -0.835319 |
| C                | -1.860606               | -1.032393 | -1.635346 |

-----  
-----  
Energy = -643.694979 hartree  
-----  
-----  
-----

Mn-SO-TS1  
-----  
-----

| Atomic<br>Number | Coordinates (Angstroms) |           |          |
|------------------|-------------------------|-----------|----------|
|                  | X                       | Y         | Z        |
| C                | 1.323279                | -1.328734 | 2.789700 |
| C                | 2.087829                | -0.537881 | 3.822365 |
| C                | 1.299709                | 0.003240  | 4.925475 |
| C                | -0.248245               | -0.340711 | 4.843929 |
| C                | -0.383871               | -1.353158 | 3.267132 |
| Mn               | 0.984685                | -2.264483 | 4.859888 |
| C                | 0.206247                | -4.068372 | 3.931787 |
| O                | -0.275279               | -5.184235 | 3.357641 |
| C                | 0.762438                | -1.983064 | 7.020672 |
| O                | 0.626152                | -1.810420 | 8.346056 |
| Si               | 3.891859                | -2.993963 | 4.961109 |
| H                | 3.994031                | -5.534320 | 5.225827 |
| C                | 4.618363                | -4.726005 | 5.612332 |
| C                | 4.378494                | -3.144049 | 3.047842 |
| C                | 5.036275                | -1.563434 | 5.700916 |
| H                | 5.792895                | -2.008579 | 6.350587 |
| H                | 4.416221                | -0.872937 | 6.276816 |
| H                | 5.521885                | -1.027989 | 4.882328 |
| H                | 2.901691                | -3.038182 | 6.460051 |

-----  
-----  
-----

Mn-SO-Pro  
-----  
-----

| Atomic<br>Number | Coordinates (Angstroms) |             |             |
|------------------|-------------------------|-------------|-------------|
|                  | X                       | Y           | Z           |
| H                | -2.69461800             | 2.20301100  | 0.57626800  |
| C                | -2.67854400             | 1.15703600  | 0.28578100  |
| C                | -2.67556300             | 0.05189900  | 1.16950800  |
| H                | -2.66506900             | 1.25165400  | -1.95352000 |
| H                | -2.68098300             | 0.10596400  | 2.25406800  |
| C                | -2.65795100             | -1.13439300 | 0.39726600  |
| H                | -2.65916500             | -2.14786400 | 0.78613100  |
| C                | -2.64849200             | -0.76138000 | -0.97844100 |
| H                | -2.64469100             | -1.44092200 | -1.82460900 |
| C                | -2.66133500             | 0.65558800  | -1.04664400 |
| Mn               | -0.71992900             | 0.00049900  | -0.07611100 |
| C                | 0.06437600              | -0.00294700 | 1.70284900  |
| O                | 0.48349100              | -0.00511500 | 2.76748200  |
| C                | -0.02820700             | -1.73288000 | -0.57367300 |
| O                | 0.28565400              | -2.76954000 | -0.94148100 |
| Si               | 0.25410715              | 1.54739902  | -2.06166819 |
| C                | 1.63207176              | 0.71354669  | -3.05631398 |
| H                | 2.01829270              | 1.45708445  | -3.76901057 |
| H                | 1.27443688              | -0.14881227 | -3.63049212 |
| H                | 2.46811624              | 0.39172219  | -2.42253341 |
| C                | 1.00538963              | 3.17194678  | -1.44501672 |
| H                | 1.78970020              | 3.01200931  | -0.69421640 |
| H                | 0.25333469              | 3.85128038  | -1.02769514 |
| H                | 1.46668059              | 3.66880381  | -2.31118089 |
| C                | -1.14230040             | 1.97442153  | -3.25484748 |
| H                | -1.94335577             | 2.52370723  | -2.74257119 |
| H                | -1.57521891             | 1.06818876  | -3.69850054 |
| H                | -0.75335998             | 2.60588681  | -4.06652823 |
| H                | -1.30612086             | 1.46943112  | 0.34554220  |

Mn-SO-Rea

| Atomic<br>Number | Coordinates (Angstroms) |           |           |
|------------------|-------------------------|-----------|-----------|
|                  | X                       | Y         | Z         |
| Mn               | 0.000000                | 0.000000  | 0.000000  |
| C                | 0.000000                | 0.000000  | 2.248000  |
| C                | 1.368796                | 0.000000  | 1.819141  |
| C                | 1.601953                | -1.177293 | 1.085954  |
| C                | 0.377549                | -1.949087 | 1.081642  |
| C                | -0.583188               | -1.233647 | 1.824915  |
| H                | -0.459439               | 0.727828  | 2.878790  |
| H                | 2.084739                | 0.766546  | 2.018124  |
| H                | 2.530086                | -1.477933 | 0.653354  |
| H                | 0.254360                | -2.921036 | 0.658828  |
| H                | -1.583301               | -1.550556 | 2.023671  |
| C                | -1.828041               | 0.198279  | -0.478999 |
| C                | 0.407005                | 1.796701  | -0.375256 |
| C                | 0.497943                | -0.598443 | -1.652263 |
| O                | -2.935738               | 0.295330  | -0.747266 |
| O                | 0.678889                | 2.891600  | -0.578733 |
| O                | 0.834856                | -0.999856 | -2.680500 |

Energy = -633.371131 hartree

Mn-T1-Min

| Atomic<br>Number | Coordinates (Angstroms) |             |             |
|------------------|-------------------------|-------------|-------------|
|                  | X                       | Y           | Z           |
| Mn               | 0.01237600              | -0.01548500 | -0.02081700 |
| C                | 0.02864400              | -0.03545100 | 2.28356600  |
| C                | 1.39501700              | -0.04364300 | 1.88176800  |
| C                | 1.61750900              | -1.20818100 | 1.12536100  |
| C                | 0.39907200              | -1.97492600 | 1.12145200  |

|   |             |             |             |
|---|-------------|-------------|-------------|
| C | -0.55694200 | -1.26785100 | 1.87426800  |
| H | -0.45073500 | 0.72432500  | 2.90039800  |
| H | 2.12138600  | 0.74683800  | 2.07216700  |
| H | 2.55751600  | -1.51100800 | 0.66537500  |
| H | 0.26971500  | -2.95587700 | 0.66560000  |
| H | -1.58419100 | -1.57894600 | 2.06565700  |
| C | -2.04627400 | 0.18387500  | -0.54637600 |
| C | 0.48576800  | 1.99827500  | -0.43623000 |
| C | 0.51302100  | -0.61313000 | -1.70656000 |
| O | -3.13959700 | 0.27477500  | -0.81160300 |
| O | 0.75588300  | 3.07502500  | -0.64115100 |
| O | 0.86830200  | -1.03018400 | -2.71347300 |

-----  
-----  
Mn-T1-TS1  
-----  
-----

| Atomic<br>Number | Coordinates (Angstroms) |   |   |
|------------------|-------------------------|---|---|
|                  | X                       | Y | Z |

|    |             |             |             |
|----|-------------|-------------|-------------|
| Mn | 0.03997700  | -0.25793700 | -0.03759500 |
| C  | 1.44614800  | 1.21644200  | -1.07807900 |
| C  | 1.99420700  | -0.10333400 | -1.18484500 |
| C  | 2.28980600  | -0.56647600 | 0.11396000  |
| C  | 1.91257000  | 0.46733600  | 1.03621100  |
| C  | 1.45043800  | 1.58072700  | 0.29106900  |
| H  | 1.14923000  | 1.85505000  | -1.91070000 |
| H  | 2.14821800  | -0.65280800 | -2.11640200 |
| H  | 2.72285400  | -1.53351400 | 0.37586700  |
| H  | 2.03407600  | 0.42455200  | 2.11909300  |
| H  | 1.10821300  | 2.53095400  | 0.70954300  |
| C  | -1.84405700 | 1.58758800  | 0.33502900  |
| C  | -1.23534400 | -0.95494700 | -1.41886800 |
| C  | -0.57206200 | -1.29361400 | 1.36457800  |
| O  | -2.58519300 | 2.39840200  | 0.58479100  |
| O  | -1.90379800 | -1.41314300 | -2.21536200 |
| O  | -0.86253900 | -1.95752500 | 2.25659100  |

Mn-T1-IM

| Atomic<br>Number | Coordinates (Angstroms) |             |             |
|------------------|-------------------------|-------------|-------------|
|                  | X                       | Y           | Z           |
| Mn               | 0.00090200              | 0.00488200  | 0.74993200  |
| H                | 2.20279400              | -0.60695900 | -1.13797100 |
| C                | 1.16248800              | -0.32510300 | -1.11462500 |
| C                | 0.66022900              | 1.00772100  | -1.09909600 |
| H                | 0.11820500              | -2.29089400 | -1.13913800 |
| H                | 1.25781800              | 1.90509800  | -1.09651500 |
| C                | -0.75232100             | 0.93964200  | -1.06859000 |
| H                | -1.43398800             | 1.77456800  | -1.06537200 |
| C                | -1.12398000             | -0.44447600 | -1.08043600 |
| H                | -2.13187500             | -0.82671100 | -1.08649100 |
| C                | 0.06037700              | -1.21380800 | -1.13747000 |
| C                | -1.43003900             | 0.16809900  | 1.89921600  |
| O                | -2.35938300             | 0.28052400  | 2.56036800  |
| C                | 1.42521100              | -0.13863800 | 1.92216100  |
| O                | 2.34356100              | -0.23394600 | 2.59984700  |

Mn-T1-Cpx

| Atomic<br>Number | Coordinates (Angstroms) |            |             |
|------------------|-------------------------|------------|-------------|
|                  | X                       | Y          | Z           |
| Mn               | -0.77593200             | 0.05031500 | -0.02051400 |
| C                | -0.47006500             | 1.60552700 | -0.98857900 |
| 8                | -0.35719600             | 2.56390300 | -1.61149700 |
| C                | -0.78968700             | 1.10002900 | 1.67263100  |
| 8                | -0.85401700             | 1.70654900 | 2.62790500  |







|     |             |             |             |
|-----|-------------|-------------|-------------|
| Mn  | -0.6918980  | -0.2163386  | 0.0006808   |
| C   | -0.1238799  | -1.0383770  | -1.5339311  |
| O   | 0.1545289   | -1.5114556  | -2.5405051  |
| C   | -0.8490705  | -1.8552886  | 0.9746659   |
| O   | -0.9866833  | -2.8297106  | 1.5412130   |
| H   | -3.6028160  | -0.1781823  | 0.7173930   |
| H   | -1.9363517  | 1.2266539   | 2.3193889   |
| H   | -0.2588824  | 2.6326078   | 0.7419878   |
| H   | -0.8990195  | 2.1213749   | -1.8311815  |
| H   | -2.9737813  | 0.3780565   | -1.8413116  |
| Si  | 2.3378050   | 0.2202454   | 0.3348618   |
| H   | 2.5264662   | -1.9893827  | -0.8208271  |
| C   | 3.0325168   | -1.4959940  | 0.0260953   |
| H   | 4.1087808   | -1.4320924  | -0.2133723  |
| H   | 2.9237297   | -2.1375997  | 0.9167341   |
| H   | 1.9203449   | 0.7397186   | -2.0792764  |
| C   | 2.3575439   | 1.2738691   | -1.2199293  |
| H   | 1.7929447   | 2.2103334   | -1.0732571  |
| H   | 3.3986629   | 1.5416404   | -1.4751348  |
| C   | 3.2541350   | 1.0929213   | 1.7276118   |
| H   | 3.2269918   | 0.4988531   | 2.6566873   |
| H   | 2.7964483   | 2.0747484   | 1.9390493   |
| H   | 4.3112647   | 1.2609206   | 1.4585032   |
| H   | 0.9368561   | 0.0865805   | 0.9073475   |
| -1  | 0.00271252  | -0.00245509 | 0.00498967  |
| -2  | -0.00427054 | 0.02467005  | 0.00990108  |
| -3  | 0.00343301  | 0.00287065  | -0.00544188 |
| -4  | -0.01889062 | 0.01889311  | -0.00757508 |
| -5  | -0.02091962 | 0.00596999  | 0.00466603  |
| -6  | -0.01581939 | 0.00840570  | -0.05187705 |
| -7  | 0.00305851  | 0.00501219  | 0.02099203  |
| -8  | 0.00553834  | -0.01381301 | -0.02653927 |
| -9  | 0.00540773  | -0.06563637 | 0.03492637  |
| -10 | 0.00016179  | 0.00685479  | -0.00453034 |
| -11 | 0.00018205  | -0.00087901 | 0.00023053  |
| -12 | 0.00057804  | -0.00047351 | 0.00059109  |
| -13 | -0.00126464 | 0.00083510  | 0.00040427  |
| -14 | 0.00036701  | -0.00094017 | -0.00052874 |
| -15 | 0.00056426  | 0.00009953  | 0.00002119  |
| -16 | 0.00231221  | -0.00188603 | 0.01401018  |

|     |             |             |             |
|-----|-------------|-------------|-------------|
| -17 | -0.00017859 | 0.00030086  | -0.00021751 |
| -18 | 0.00191100  | -0.00040468 | -0.00136791 |
| -19 | 0.00030616  | -0.00067186 | 0.00009122  |
| -20 | 0.00020739  | 0.00010979  | 0.00031486  |
| -21 | 0.00017761  | -0.00022925 | -0.00030268 |
| -22 | -0.00284330 | -0.00013116 | -0.00112741 |
| -23 | 0.00024519  | 0.00081560  | -0.00021148 |
| -24 | -0.00009993 | -0.00011508 | 0.00059975  |
| -25 | 0.00599167  | 0.00100204  | -0.00217584 |
| -26 | -0.00022120 | -0.00032339 | -0.00016546 |
| -27 | -0.00022275 | 0.00007116  | -0.00008990 |
| -28 | 0.00084222  | 0.00101815  | 0.00168591  |
| -29 | 0.03073385  | 0.01102992  | 0.00872639  |

Mn-T1/S0-1

| Atomic<br>Number | Coordinates (Angstroms) |             |             |
|------------------|-------------------------|-------------|-------------|
|                  | X                       | Y           | Z           |
| H                | 0.87493100              | 1.28597800  | 2.01093800  |
| C                | 1.19032000              | 0.67712200  | 1.17909800  |
| C                | 1.67737700              | 1.15726000  | -0.07730700 |
| H                | 0.89496600              | -1.38770900 | 1.94382500  |
| H                | 1.81166800              | 2.18943000  | -0.35705500 |
| C                | 1.98671600              | 0.02815200  | -0.87180600 |
| H                | 2.34861500              | 0.05685200  | -1.88876200 |
| C                | 1.69513500              | -1.14481300 | -0.13393000 |
| H                | 1.84784000              | -2.15950600 | -0.46243600 |
| C                | 1.20187200              | -0.73376500 | 1.14394900  |
| Mn               | -0.14922100             | -0.00146900 | -0.38895000 |
| C                | -1.36863600             | 1.30470600  | -0.10428500 |
| O                | -2.11985000             | 2.13817700  | 0.14248500  |
| C                | -1.37886400             | -1.29887000 | -0.10344400 |
| O                | -2.13902500             | -2.12406100 | 0.14296500  |

-----  
-----  
-----  
Mn-SO-IM  
-----  
-----

| Atomic<br>Number | Coordinates (Angstroms) |           |           |
|------------------|-------------------------|-----------|-----------|
|                  | X                       | Y         | Z         |
| Mn               | 0.000000                | 0.000000  | 0.000000  |
| C                | 0.000000                | 0.000000  | 2.347899  |
| C                | 1.349262                | 0.000000  | 1.865830  |
| C                | 1.561353                | -1.200492 | 1.138030  |
| C                | 0.340729                | -1.941789 | 1.147485  |
| C                | -0.609494               | -1.201423 | 1.912268  |
| H                | -0.440723               | 0.743981  | 2.973975  |
| H                | 2.079233                | 0.756598  | 2.052093  |
| H                | 2.488351                | -1.516739 | 0.711519  |
| H                | 0.199955                | -2.926908 | 0.758517  |
| H                | -1.608478               | -1.512015 | 2.131338  |
| C                | -1.812223               | 0.124116  | -0.747739 |
| C                | 0.475651                | 1.646234  | -0.544997 |
| O                | -2.872036               | 0.209889  | -1.148053 |
| O                | 0.809906                | 2.726175  | -0.850613 |

-----  
-----  
Energy = -520.607049 hartree  
-----  
-----  
-----

Mn-SO-Cpx  
-----  
-----

| Atomic<br>Number | Coordinates (Angstroms) |          |          |
|------------------|-------------------------|----------|----------|
|                  | X                       | Y        | Z        |
| Mn               | -0.688066               | 0.036969 | 0.005150 |

|    |           |           |           |
|----|-----------|-----------|-----------|
| C  | -0.423486 | 1.529697  | -0.971437 |
| O  | -0.291306 | 2.491320  | -1.614250 |
| C  | -0.743105 | 0.966888  | 1.608026  |
| O  | -0.821534 | 1.549844  | 2.599170  |
| Si | 2.539703  | -0.487070 | -0.070810 |
| C  | 2.775750  | -0.355085 | -1.939938 |
| H  | 2.457965  | 0.612203  | -2.313079 |
| H  | 2.212328  | -1.117529 | -2.467222 |
| H  | 3.824407  | -0.481572 | -2.195652 |
| C  | 3.408895  | 0.912328  | 0.850160  |
| H  | 3.061369  | 1.881649  | 0.508805  |
| H  | 4.481829  | 0.869280  | 0.686106  |
| H  | 3.233575  | 0.852098  | 1.919237  |
| C  | 3.037558  | -2.189339 | 0.580786  |
| H  | 4.091023  | -2.378585 | 0.394983  |
| H  | 2.469483  | -2.977595 | 0.097672  |
| H  | 2.869479  | -2.263958 | 1.650191  |
| H  | 1.081467  | -0.361763 | 0.245184  |
| H  | -0.238966 | -2.536712 | -1.492619 |
| C  | -1.013858 | -1.981391 | -1.011491 |
| C  | -1.405164 | -2.094677 | 0.355422  |
| H  | -1.832129 | -0.743042 | -2.663031 |
| H  | -1.005067 | -2.776154 | 1.073457  |
| C  | -2.533463 | -1.239100 | 0.553698  |
| H  | -3.070093 | -1.118794 | 1.470083  |
| C  | -2.807665 | -0.568264 | -0.658528 |
| H  | -3.607335 | 0.116902  | -0.835319 |
| C  | -1.860606 | -1.032393 | -1.635346 |

-----  
 -----  
 Energy = -643.694979 hartree  
 -----  
 -----  
 -----

Mn-SO-TS1  
 -----  
 -----

| Atomic<br>Number | Coordinates (Angstroms) |   |   |
|------------------|-------------------------|---|---|
|                  | X                       | Y | Z |

|    |           |           |          |
|----|-----------|-----------|----------|
| C  | 1.323279  | -1.328734 | 2.789700 |
| C  | 2.087829  | -0.537881 | 3.822365 |
| C  | 1.299709  | 0.003240  | 4.925475 |
| C  | -0.248245 | -0.340711 | 4.843929 |
| C  | -0.383871 | -1.353158 | 3.267132 |
| Mn | 0.984685  | -2.264483 | 4.859888 |
| C  | 0.206247  | -4.068372 | 3.931787 |
| O  | -0.275279 | -5.184235 | 3.357641 |
| C  | 0.762438  | -1.983064 | 7.020672 |
| O  | 0.626152  | -1.810420 | 8.346056 |
| Si | 3.891859  | -2.993963 | 4.961109 |
| H  | 3.994031  | -5.534320 | 5.225827 |
| C  | 4.618363  | -4.726005 | 5.612332 |
| C  | 4.378494  | -3.144049 | 3.047842 |
| C  | 5.036275  | -1.563434 | 5.700916 |
| H  | 5.792895  | -2.008579 | 6.350587 |
| H  | 4.416221  | -0.872937 | 6.276816 |
| H  | 5.521885  | -1.027989 | 4.882328 |
| H  | 2.901691  | -3.038182 | 6.460051 |

Mn-SO-Pro

| Atomic<br>Number | Coordinates (Angstroms) |             |             |
|------------------|-------------------------|-------------|-------------|
|                  | X                       | Y           | Z           |
| H                | -2.69461800             | 2.20301100  | 0.57626800  |
| C                | -2.67854400             | 1.15703600  | 0.28578100  |
| C                | -2.67556300             | 0.05189900  | 1.16950800  |
| H                | -2.66506900             | 1.25165400  | -1.95352000 |
| H                | -2.68098300             | 0.10596400  | 2.25406800  |
| C                | -2.65795100             | -1.13439300 | 0.39726600  |
| H                | -2.65916500             | -2.14786400 | 0.78613100  |
| C                | -2.64849200             | -0.76138000 | -0.97844100 |

|    |             |             |             |
|----|-------------|-------------|-------------|
| H  | -2.64469100 | -1.44092200 | -1.82460900 |
| C  | -2.66133500 | 0.65558800  | -1.04664400 |
| Mn | -0.71992900 | 0.00049900  | -0.07611100 |
| C  | 0.06437600  | -0.00294700 | 1.70284900  |
| O  | 0.48349100  | -0.00511500 | 2.76748200  |
| C  | -0.02820700 | -1.73288000 | -0.57367300 |
| O  | 0.28565400  | -2.76954000 | -0.94148100 |
| Si | 0.25410715  | 1.54739902  | -2.06166819 |
| C  | 1.63207176  | 0.71354669  | -3.05631398 |
| H  | 2.01829270  | 1.45708445  | -3.76901057 |
| H  | 1.27443688  | -0.14881227 | -3.63049212 |
| H  | 2.46811624  | 0.39172219  | -2.42253341 |
| C  | 1.00538963  | 3.17194678  | -1.44501672 |
| H  | 1.78970020  | 3.01200931  | -0.69421640 |
| H  | 0.25333469  | 3.85128038  | -1.02769514 |
| H  | 1.46668059  | 3.66880381  | -2.31118089 |
| C  | -1.14230040 | 1.97442153  | -3.25484748 |
| H  | -1.94335577 | 2.52370723  | -2.74257119 |
| H  | -1.57521891 | 1.06818876  | -3.69850054 |
| H  | -0.75335998 | 2.60588681  | -4.06652823 |
| H  | -1.30612086 | 1.46943112  | 0.34554220  |

-----  
-----  
-----  
-----

-----  
-----

Re-S<sub>0</sub>-Rea

-----  
-----

| Atomic<br>Number | Coordinates (Angstroms) |   |   |
|------------------|-------------------------|---|---|
|                  | X                       | Y | Z |

|   |            |             |             |
|---|------------|-------------|-------------|
| H | 1.98416200 | -1.10965800 | -1.99559800 |
| C | 1.98254600 | -0.58646100 | -1.05256600 |
| C | 1.98376300 | -1.19237400 | 0.23314900  |

|    |             |             |             |
|----|-------------|-------------|-------------|
| H  | 2.00544000  | 1.55045700  | -1.67662200 |
| H  | 2.00718400  | -2.24942700 | 0.43941200  |
| C  | 1.98245700  | -0.14644500 | 1.19716200  |
| H  | 1.98416200  | -0.27593800 | 2.26755900  |
| C  | 1.98656100  | 1.09143700  | 0.51392500  |
| H  | 2.00260500  | 2.06761100  | 0.97008300  |
| C  | 1.98699600  | 0.81787100  | -0.88658800 |
| Re | -0.05309000 | 0.00013800  | -0.00058900 |
| C  | -1.19163400 | -0.98220800 | -1.17390800 |
| O  | -1.84425800 | -1.58448900 | -1.89338900 |
| C  | -1.18261900 | 1.51363700  | -0.26395400 |
| O  | -1.83076300 | 2.44181200  | -0.42274600 |
| C  | -1.19075600 | -0.52664900 | 1.43644100  |
| O  | -1.84319200 | -0.84810700 | 2.31831100  |

-----  
 -----  
 Energy = -611.732864 hartree  
 -----  
 -----  
 -----  
 -----

Re-S<sub>1</sub>S<sub>0</sub>-CI  
 -----  
 -----

| Atomic<br>Number | Coordinates (Angstroms) |           |           |
|------------------|-------------------------|-----------|-----------|
|                  | X                       | Y         | Z         |
| H                | 2.086572                | -1.118823 | -1.973987 |
| C                | 2.062165                | -0.605632 | -1.056009 |
| C                | 2.034709                | -1.205012 | 0.239214  |
| H                | 1.977432                | 1.520212  | -1.701191 |
| H                | 2.077253                | -2.261629 | 0.428334  |
| C                | 1.982304                | -0.162660 | 1.193818  |
| H                | 1.994598                | -0.297244 | 2.261853  |
| C                | 1.971936                | 1.084398  | 0.507733  |
| H                | 1.992623                | 2.062578  | 0.959731  |
| C                | 1.959852                | 0.809230  | -0.894463 |
| Re               | -0.071560               | 0.009282  | 0.019284  |
| C                | -1.226867               | -0.995148 | -1.198598 |



|   |           |           |           |
|---|-----------|-----------|-----------|
| O | -1.890479 | -1.583320 | -1.962968 |
| C | -1.567831 | 2.051484  | -0.333685 |
| O | -2.230834 | 2.960518  | -0.491168 |
| C | -1.215133 | -0.515396 | 1.485205  |
| O | -1.878022 | -0.819140 | 2.361236  |

**Derivative Coupling**

|     |               |               |               |
|-----|---------------|---------------|---------------|
| -1  | 0.0016738369  | 0.0002166014  | -0.0037919873 |
| -2  | -0.0089687170 | -0.0095896018 | 0.0073946545  |
| -3  | 0.0292339935  | 0.0198667053  | -0.0179275358 |
| -4  | -0.0030334261 | -0.0002135546 | 0.0008404822  |
| -5  | -0.0037655761 | 0.0023379296  | -0.0007916454 |
| -6  | -0.0301494156 | -0.0360569091 | 0.0135073103  |
| -7  | 0.0020832973  | 0.0008206616  | -0.0027179389 |
| -8  | 0.0130746159  | 0.0258058080  | -0.0043980020 |
| -9  | 0.0017727614  | 0.0027706892  | 0.0018995933  |
| -10 | 0.0037319162  | -0.0166920063 | -0.0028837538 |
| -11 | -0.0052684528 | 0.0148316165  | 0.0159237686  |
| -12 | -0.0051762968 | -0.0067444527 | 0.0004402402  |
| -13 | 0.0000035894  | 0.0028127192  | 0.0005765301  |
| -14 | 0.0098178354  | -0.0081466693 | 0.0057821195  |
| -15 | -0.0023858618 | 0.0030213739  | -0.0018034094 |
| -16 | -0.0036686130 | 0.0054140116  | -0.0127503076 |
| -17 | 0.0010245131  | -0.0004549224 | 0.0006998815  |

**Unscaled Gradient Difference**

|     |               |               |               |
|-----|---------------|---------------|---------------|
| -1  | 0.0102770236  | -0.0035071101 | 0.0001307568  |
| -2  | -0.0427938155 | 0.0051238832  | 0.0132984335  |
| -3  | 0.0086436284  | 0.0296534947  | -0.0060224703 |
| -4  | -0.0086609876 | -0.0016359273 | 0.0018203075  |
| -5  | -0.0086918380 | -0.0033165123 | -0.0015803500 |
| -6  | -0.0375849706 | -0.0124812142 | -0.0259715365 |
| -7  | -0.0029549073 | 0.0050629814  | 0.0037877229  |
| -8  | -0.0265102807 | 0.0070123412  | 0.0131575354  |
| -9  | 0.0030379887  | -0.0008889160 | -0.0006506971 |
| -10 | 0.0361359092  | -0.0151908622 | -0.0245243842 |
| -11 | 0.1143855592  | -0.0616028736 | 0.0618968979  |
| -12 | -0.0437773856 | 0.0349952399  | -0.0208906602 |
| -13 | 0.0129282771  | 0.0038507727  | 0.0145084101  |
| -14 | -0.0105593109 | 0.0007744255  | -0.0127642428 |
| -15 | 0.0045730777  | -0.0045200163 | 0.0021919550  |
| -16 | -0.0173092794 | 0.0160048448  | -0.0123633084 |

-17 0.0088613117 0.0006654485 -0.0060243698

-----  
-----  
Re-S<sub>0</sub>-Int  
-----  
-----

| Atomic<br>Number | Coordinates (Angstroms) |             |             |
|------------------|-------------------------|-------------|-------------|
|                  | X                       | Y           | Z           |
| H                | -0.84285900             | -1.36798700 | 2.08589900  |
| C                | -1.21211200             | -0.72914100 | 1.30076900  |
| C                | -1.87770200             | -1.15521500 | 0.10524300  |
| H                | -0.83339900             | 1.31961900  | 2.11639200  |
| H                | -2.07140000             | -2.17199900 | -0.19208600 |
| C                | -2.23848700             | 0.01177000  | -0.60910200 |
| H                | -2.71474600             | 0.02433700  | -1.57818500 |
| C                | -1.87063200             | 1.15834700  | 0.13156300  |
| H                | -2.05494500             | 2.18326400  | -0.14298200 |
| C                | -1.20560400             | 0.70102900  | 1.31676500  |
| Re               | 0.11072500              | -0.00135200 | -0.30525800 |
| C                | 1.40559200              | -1.33597600 | 0.06489900  |
| O                | 2.12518500              | -2.16596200 | 0.40017000  |
| C                | 1.39461200              | 1.34535800  | 0.06115900  |
| O                | 2.10468700              | 2.18309900  | 0.39702000  |

-----  
-----  
Energy = -498.317584 hartree  
-----  
-----  
-----  
-----

Re-S<sub>0</sub>-Cpx  
-----  
-----

| Atomic<br>Number | Coordinates (Angstroms) |          |           |
|------------------|-------------------------|----------|-----------|
|                  | X                       | Y        | Z         |
| Re               | -0.461314               | 0.182468 | -0.056067 |

|    |           |           |           |
|----|-----------|-----------|-----------|
| C  | 0.340814  | 0.989217  | -1.623543 |
| C  | -0.920427 | 2.006550  | 0.515103  |
| Si | 2.040557  | -0.341168 | 0.271832  |
| H  | 2.186111  | -2.252440 | -1.375566 |
| C  | 2.715772  | -1.315401 | -1.223100 |
| H  | 3.764668  | -1.559460 | -1.061944 |
| H  | 2.653448  | -0.750257 | -2.148489 |
| H  | 1.789816  | -2.364140 | 1.765309  |
| C  | 2.367617  | -1.443543 | 1.787704  |
| H  | 3.418111  | -1.724182 | 1.828853  |
| H  | 2.127215  | -0.931128 | 2.715296  |
| H  | 3.039429  | 1.865049  | -0.407416 |
| C  | 3.129334  | 1.202816  | 0.449689  |
| H  | 2.864965  | 1.775768  | 1.334328  |
| H  | 4.178214  | 0.925676  | 0.537384  |
| H  | 0.484130  | 0.463915  | 1.305032  |
| O  | -1.212334 | 3.036401  | 0.863593  |
| O  | 0.777034  | 1.433251  | -2.568805 |
| C  | -1.443114 | -1.580273 | -1.224812 |
| C  | -1.513511 | -1.622657 | 1.065848  |
| C  | -2.517946 | -0.742965 | 0.617589  |
| C  | -2.478466 | -0.704085 | -0.804379 |
| C  | -0.842191 | -2.142611 | -0.074004 |
| H  | -1.179578 | -1.801524 | -2.239130 |
| H  | -0.063730 | -2.876057 | -0.065526 |
| H  | -1.297646 | -1.864754 | 2.085861  |
| H  | -3.204393 | -0.207163 | 1.241369  |
| H  | -3.152894 | -0.170765 | -1.441323 |

-----  
-----  
Energy = -904.4629 hartree  
-----  
-----  
-----  
-----

Re-S<sub>0</sub>-TS1  
-----  
-----

| Atomic<br>Number | Coordinates (Angstroms) |   |   |
|------------------|-------------------------|---|---|
|                  | X                       | Y | Z |

---



---

|    |             |             |             |
|----|-------------|-------------|-------------|
| Re | 0.49492200  | 0.10383200  | -0.10421100 |
| C  | 1.33718600  | 1.73240200  | -0.79711300 |
| C  | -0.24375000 | 1.33450300  | 1.11274600  |
| Si | -2.05146800 | -0.15944800 | -0.21648200 |
| H  | -0.31500800 | -1.06402000 | -4.14433800 |
| C  | 2.33712200  | -1.30138500 | -0.33046700 |
| C  | 2.18726000  | -0.84616100 | 1.01788100  |
| C  | 0.96013500  | -1.37702200 | 1.51607500  |
| C  | 0.35341200  | -2.13627400 | 0.47542800  |
| C  | 1.21603600  | -2.09600500 | -0.65711300 |
| H  | 3.15880200  | -1.07426800 | -0.99025300 |
| H  | 2.89728700  | -0.26060500 | 1.57744200  |
| H  | 0.56867500  | -1.24447700 | 2.51198700  |
| H  | -0.56714800 | -2.69102100 | 0.54542600  |
| H  | 1.01502500  | -2.53756500 | -1.62117600 |
| C  | -2.47615800 | -1.54098200 | -1.41794000 |
| C  | -2.76890100 | -0.58736200 | 1.46711100  |
| C  | -2.81336100 | 1.43396400  | -0.84556400 |
| H  | -2.19057100 | -2.52743600 | -1.05064800 |
| H  | -3.55922300 | -1.54136600 | -1.57556900 |
| H  | -1.96530400 | -1.36738700 | -2.36308700 |
| H  | -2.60045800 | 0.20003700  | 2.20240300  |
| H  | -3.84877000 | -0.72571300 | 1.36746800  |
| H  | -2.35537400 | -1.51845900 | 1.85999900  |
| H  | -3.89708400 | 1.30604700  | -0.92406900 |
| H  | -2.61651500 | 2.27495200  | -0.17981400 |
| H  | -2.43082500 | 1.67542600  | -1.83841200 |
| O  | 1.87410800  | 2.67650000  | -1.13046400 |
| O  | -0.65235500 | 2.05433300  | 1.90833500  |

|    |      |      |       |
|----|------|------|-------|
| -1 | 0.00 | 0.00 | -0.01 |
| -2 | 0.00 | 0.00 | 0.00  |
| -3 | 0.00 | 0.00 | 0.00  |
| -4 | 0.00 | 0.00 | 0.00  |
| -5 | 0.25 | 0.38 | 0.89  |
| -6 | 0.00 | 0.00 | 0.00  |
| -7 | 0.00 | 0.00 | 0.00  |
| -8 | 0.00 | 0.01 | 0.00  |

|     |       |       |      |
|-----|-------|-------|------|
| -9  | 0.00  | 0.00  | 0.00 |
| -10 | 0.00  | 0.00  | 0.00 |
| -11 | 0.00  | 0.00  | 0.00 |
| -12 | 0.00  | 0.00  | 0.00 |
| -13 | 0.00  | 0.00  | 0.00 |
| -14 | 0.00  | 0.00  | 0.00 |
| -15 | 0.00  | 0.01  | 0.00 |
| -16 | -0.01 | 0.00  | 0.01 |
| -17 | 0.00  | 0.00  | 0.00 |
| -18 | 0.00  | 0.00  | 0.00 |
| -19 | 0.00  | 0.00  | 0.00 |
| -20 | -0.02 | -0.02 | 0.02 |
| -21 | -0.02 | 0.01  | 0.01 |
| -22 | 0.00  | 0.00  | 0.00 |
| -23 | 0.00  | 0.00  | 0.00 |
| -24 | 0.00  | 0.00  | 0.00 |
| -25 | 0.00  | 0.00  | 0.00 |
| -26 | 0.00  | 0.00  | 0.00 |
| -27 | 0.00  | -0.01 | 0.00 |
| -28 | 0.00  | 0.00  | 0.00 |
| -29 | 0.00  | 0.00  | 0.00 |

-----  
 Energy = -907.908487 hartree  
 -----  
 -----  
 -----

Re-S<sub>0</sub>-Pro  
 -----  
 -----

| Atomic<br>Number | Coordinates (Angstroms) |   |   |
|------------------|-------------------------|---|---|
|                  | X                       | Y | Z |

|    |           |           |           |
|----|-----------|-----------|-----------|
| Re | -0.395268 | -0.205143 | 0.341581  |
| C  | 0.108960  | 1.471352  | -0.365068 |
| O  | 0.388813  | 2.485391  | -0.828387 |
| C  | -0.653028 | 0.789668  | 1.955178  |
| O  | -0.814222 | 1.375482  | 2.922534  |

|    |           |           |           |
|----|-----------|-----------|-----------|
| Si | 2.057520  | -0.412748 | -0.135730 |
| C  | 2.299756  | -0.264258 | -2.002230 |
| H  | 1.944454  | 0.695945  | -2.380194 |
| H  | 1.773915  | -1.056702 | -2.539479 |
| H  | 3.362948  | -0.349978 | -2.242851 |
| C  | 3.114231  | 0.895966  | 0.696092  |
| H  | 2.825607  | 1.903396  | 0.392654  |
| H  | 4.165809  | 0.753553  | 0.435666  |
| H  | 3.023634  | 0.832413  | 1.782385  |
| C  | 2.774829  | -2.086845 | 0.354954  |
| H  | 3.788921  | -2.184358 | -0.040719 |
| H  | 2.187977  | -2.924523 | -0.026419 |
| H  | 2.826390  | -2.186625 | 1.440994  |
| H  | 0.819789  | -0.631572 | 1.387522  |
| H  | 0.170378  | -2.708298 | -1.324177 |
| C  | -0.668754 | -2.156020 | -0.933827 |
| C  | -1.323817 | -2.393666 | 0.307365  |
| H  | -1.103156 | -0.697851 | -2.562575 |
| H  | -1.048732 | -3.138152 | 1.036545  |
| C  | -2.396519 | -1.478282 | 0.412735  |
| H  | -3.077937 | -1.399753 | 1.244814  |
| C  | -2.423373 | -0.677637 | -0.759040 |
| H  | -3.138529 | 0.096148  | -0.983463 |
| C  | -1.349845 | -1.099814 | -1.592973 |

-----  
-----  
Energy = -908.094240 hartree  
-----  
-----  
-----  
-----
